# Supplementary material
Source: Springer Nature journal article supplement (https://www.springermedizin.de/resource/supplementary/13058_2012_3168_MOESM13_ESM.pdf/9703426)

Primary Breast  
Tumor

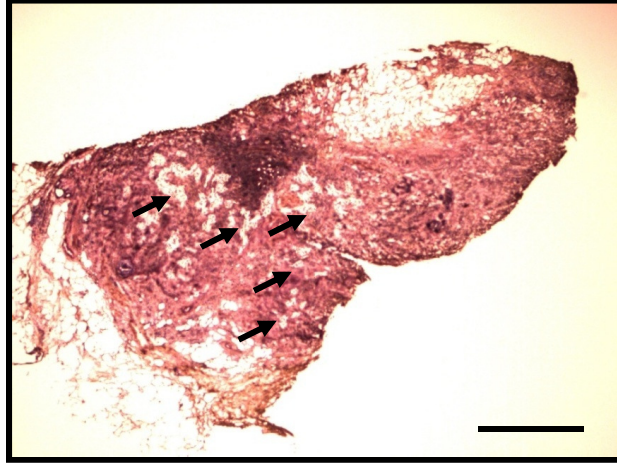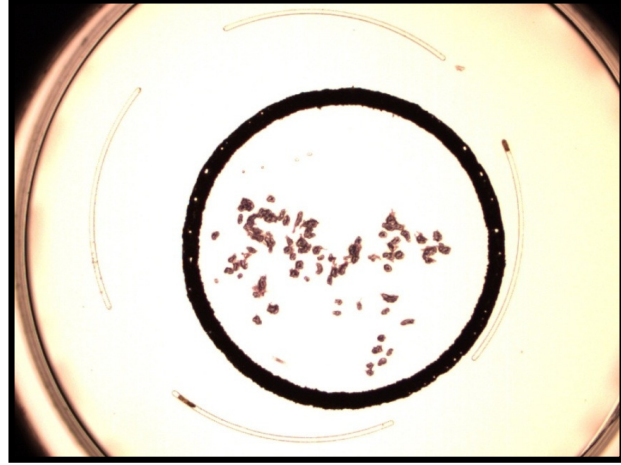

Breast Cancer  
Bone Metastases

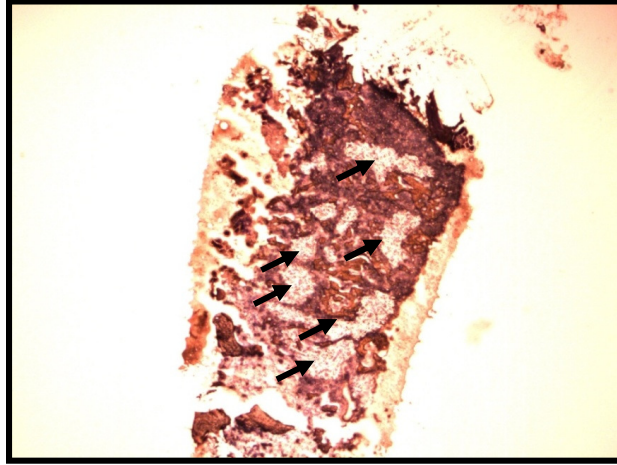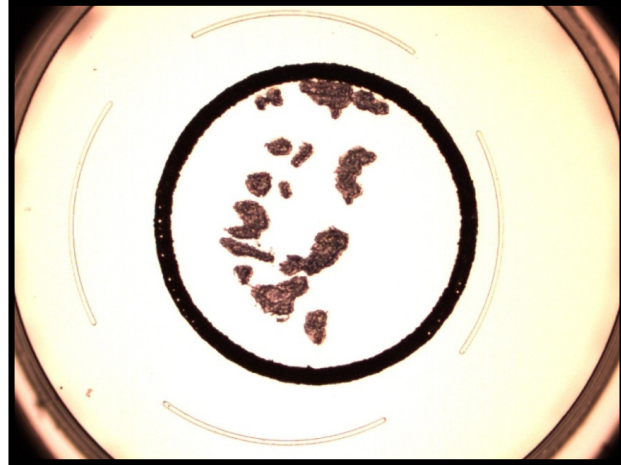

Supplement: MOESM13 [file 9703426]
